# Supplementary material for: A hierarchical integrated 3D carbon electrode derived from gingko leaves via hydrothermal carbonization of H3PO4 for high-performance supercapacitors
Source: Royal Society of Chemistry journal article supplement (doi:10.1039/d2na00758d), 2023-01-01
Supplement: d2na00758d1.pdf [file d2na00758d1.pdf]

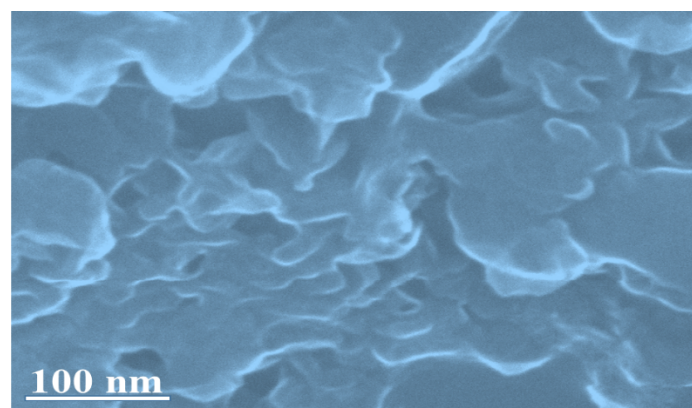

Figure S1 FESEM image of GLC

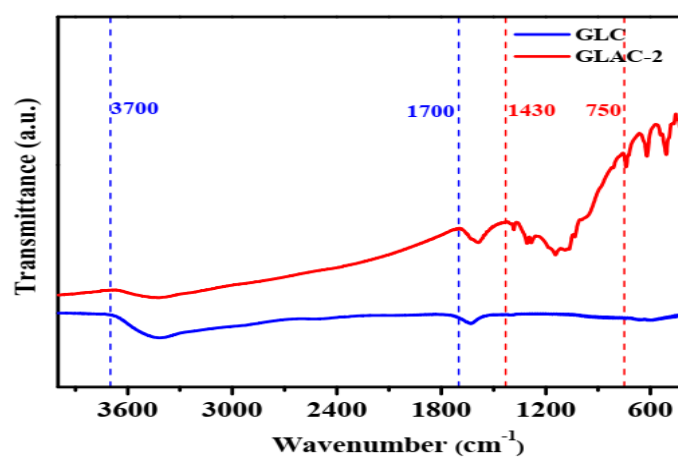

Figure S2 FTIR spectra of GLC and GLAC-2

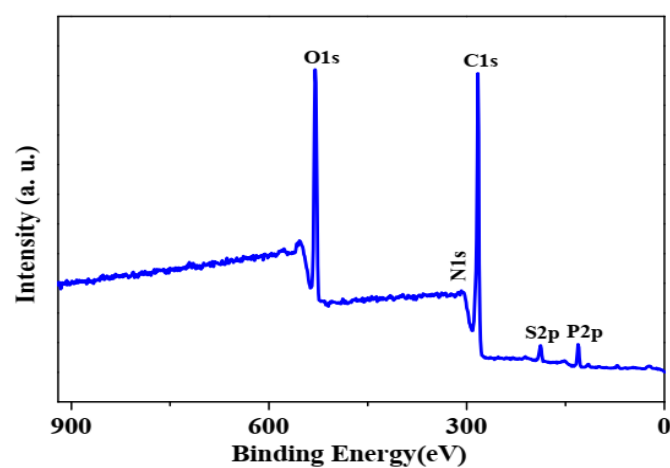

Figure S3 XPS survey spectrum of GLAC-2

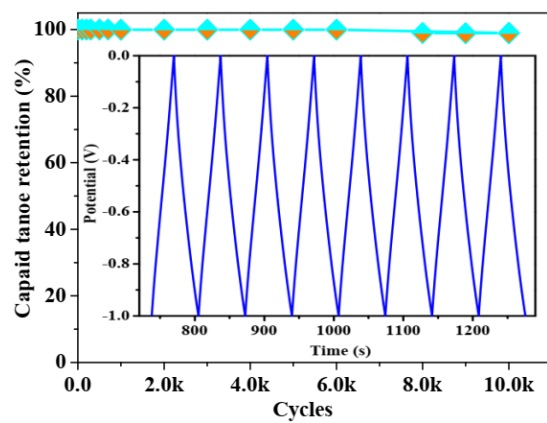

Figure S4 Cycling performance of GLAC-2 at 10 A g<sup>-1</sup>

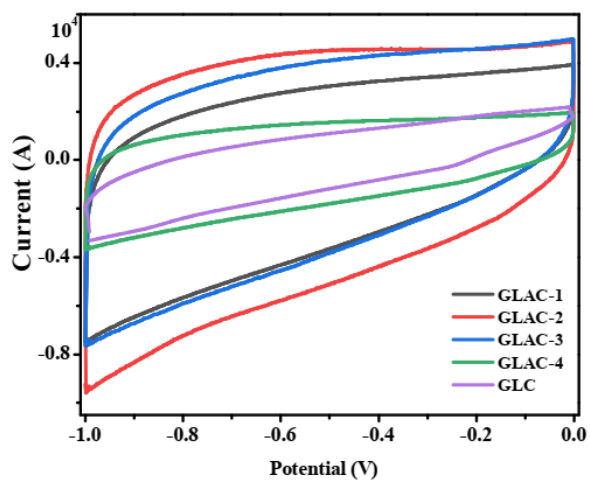

Figure S5 CV curves of GLAC samples prepared under different temperature at 100 mV/s
